# Supplementary material for: Genome-wide resequencing of KRICE_CORE reveals their potential for future breeding, as well as functional and evolutionary studies in the post-genomic era
Source: BMC Genomics. 2016 May 26;17:408. doi: 10.1186/s12864-016-2734-y (PMC4882841; doi:10.1186/s12864-016-2734-y)
Supplement: Additional file 3: Table S2. — Sequencing and mapping statistics for individual KRICE_CORE accessions. (XLSX 36 kb) [file 12864_2016_2734_MOESM3_ESM.xlsx]

## Sheet: mapping status
Sample_ID	sequence_read	clean_read	clean_read_rate(%)	sequence_base	clean_base	clean_base_rate(%)	deduplication_read	deduplication_rate(%)	mapping_read	mapping_rate(%)	unique_read	Average_gene_depth	Average_depth	reference_bp	coverage_1X_rate(%)	coverage_2X_rate(%)	coverage_5X_rate(%)	coverage_10X_rate(%)	coverage_20X_rate(%)
RWG-001	42728338	41217468	96.46	4315562138	4001280337	92.72	40692024	98.73	39874039	97.99	31535308	10.15	10.34	374308257	89.56	86.72	78.05	51.05	4.14
RWG-002	42061766	40693874	96.75	4248238366	3955816238	93.12	40223807	98.84	39351591	97.83	31352810	10.26	10.22	374308257	89.02	86.13	77.38	50.49	4.16
RWG-003	37398368	35909208	96.02	3777235168	3479738691	92.12	35455392	98.74	32450419	91.52	23036933	8.37	8.35	374308257	81.3	76.59	64.56	36.69	3.3
RWG-004	41964756	40374654	96.21	4238440356	3915502409	92.38	39894997	98.81	39057178	97.9	30672236	9.9	10.12	374308257	88.73	85.68	76.47	49.04	3.8
RWG-005	41699020	40125732	96.23	4211601020	3895987947	92.51	39579548	98.64	36432861	92.05	25876866	9.48	9.4	374308257	81.83	77.5	67.06	43.34	5.03
RWG-006	41036606	39497134	96.25	4144697206	3834297904	92.51	38981903	98.7	35888274	92.06	25403416	9.35	9.25	374308257	81.58	77.2	66.67	42.57	4.76
RWG-007	39896468	38548626	96.62	4029543268	3744683087	92.93	37876757	98.26	35199325	92.93	25050075	8.91	9.09	374308257	83.42	79.25	68.26	40.57	3.57
RWG-008	40327468	38937122	96.55	4073074268	3780683789	92.82	38360995	98.52	35327178	92.09	24577250	9.11	9.11	374308257	82.8	78.37	67.18	40.38	3.88
RWG-009	39063124	37241314	95.34	3945375524	3599512079	91.23	36735236	98.64	35721506	97.24	27531256	8.74	9.22	374308257	88.2	84.77	73.75	42.13	2.42
RWG-010	36823384	35500924	96.41	3719161784	3442369017	92.56	35016491	98.64	32160588	91.84	22400132	8.29	8.28	374308257	81.7	76.96	64.49	34.96	2.97
RWG-011	40280138	38767438	96.24	4068293938	3759864059	92.42	38256279	98.68	37210544	97.27	29127663	9.39	9.64	374308257	87.48	84.18	74.5	46.42	3.39
RWG-012	38871714	37303334	95.97	3926043114	3615010650	92.08	36906356	98.94	36047532	97.67	28798965	9.26	9.33	374308257	87.98	84.72	74.56	44.89	2.88
RWG-013	34110468	33065950	96.94	3445157268	3214098456	93.29	32533870	98.39	30108071	92.54	21051492	7.6	7.77	374308257	81.09	76.16	62.47	30.74	2.32
RWG-014	36727946	35514720	96.7	3709522546	3449027578	92.98	35095583	98.82	34227557	97.53	27125712	8.71	8.87	374308257	86.32	82.66	71.46	41.14	2.43
RWG-015	40759016	39703970	97.41	4116660616	3868225221	93.97	39260098	98.88	38296160	97.54	30239359	9.84	9.96	374308257	88.91	85.85	76.55	48.32	3.53
RWG-016	36782890	35775828	97.26	3715071890	3484337821	93.79	35460899	99.12	34718328	97.91	27897521	8.99	9.03	374308257	89.69	86.5	75.64	42	1.98
RWG-017	41256686	39995736	96.94	4166925286	3886907238	93.28	39522526	98.82	38738903	98.02	30778179	9.83	10.05	374308257	89.47	86.45	77.22	49.23	3.65
RWG-018	34612290	33365568	96.4	3495841290	3234380339	92.52	33071458	99.12	31861681	96.34	25059973	8.15	8.24	374308257	86.12	82.08	69.41	36.55	1.97
RWG-019	44530974	43473192	97.62	4497628374	4238272472	94.23	42981731	98.87	41496160	96.54	32301918	10.77	10.79	374308257	87.57	84.38	76.24	54.02	6.65
RWG-020	44306738	43302790	97.73	4474980538	4223283745	94.38	42878792	99.02	42237527	98.5	34087091	11.09	11	374308257	91.09	88.48	80.79	56.03	5.75
RWG-021	36066806	34905332	96.78	3642747406	3388521095	93.02	34455070	98.71	31826825	92.37	22280748	8.16	8.2	374308257	82.12	77.37	64.66	34.28	2.77
RWG-022	36340538	35324494	97.2	3670394338	3439061500	93.7	34834607	98.61	32170348	92.35	22511347	8.17	8.31	374308257	81.68	76.95	64.49	35.05	2.87
RWG-023	46339318	45286202	97.73	4680271118	4423168120	94.51	44591170	98.47	41141813	92.26	29279102	10.98	10.66	374308257	83.43	79.5	70.56	50.43	7.99
RWG-024	44081022	43113216	97.8	4452183222	4208390529	94.52	42599973	98.81	41738689	97.98	33224429	10.87	10.88	374308257	90.51	87.83	79.93	54.56	5.24
RWG-025	41785852	39938586	95.58	4220371052	3809988269	90.28	39519192	98.95	38898490	98.43	31223401	9.7	9.91	374308257	90.37	87.52	78.28	49.33	3.77
RWG-026	41295718	39503388	95.66	4170867518	3766592351	90.31	39058401	98.87	38052137	97.42	30163418	9.57	9.69	374308257	89.12	85.95	76.16	46.97	3.46
RWG-027	41610074	39926836	95.95	4202617474	3819088611	90.87	39523564	98.99	38362347	97.06	30366154	9.78	9.79	374308257	88.42	85.18	75.69	48.04	3.82
RWG-028	43252270	41457154	95.85	4368479270	3959033957	90.63	41089162	99.11	40070256	97.52	31853322	10.12	10.21	374308257	89.38	86.35	77.58	51.24	4.65
RWG-029	29090954	27609348	94.91	2938186354	2608204356	88.77	27344093	99.04	26438406	96.69	20752952	6.6	6.67	374308257	93.59	88.8	65.08	18.61	0.6
RWG-030	31838692	30201248	94.86	3215707892	2847904856	88.56	29774958	98.59	27328090	91.78	18927806	6.68	6.83	374308257	88.12	82.46	61.28	20.66	1.62
RWG-031	44049842	42378796	96.21	4449034042	4055265544	91.15	41882876	98.83	38751164	92.52	28039840	9.89	9.84	374308257	84.16	80.07	70.29	47.07	6.23
RWG-032	38916510	37409198	96.13	3930567510	3579660966	91.07	37037884	99.01	35358937	95.47	26980740	8.93	9.02	374308257	87.43	83.73	72.63	41.56	2.89
RWG-033	37921876	36291698	95.7	3830109476	3464517906	90.45	35864895	98.82	34676863	96.69	26661880	8.65	8.83	374308257	87.44	83.86	72.43	39.51	2.21
RWG-034	41233584	39523820	95.85	4164591984	3766121036	90.43	39030136	98.75	35793253	91.71	24742822	8.8	9.05	374308257	83.51	79.07	67.77	40.12	4.14
RWG-035	43643336	41940670	96.1	4407976936	4006636394	90.9	41573717	99.13	40708285	97.92	32859564	10.49	10.39	374308257	90.59	87.8	79.43	52.95	4.68
RWG-036	42723480	41110958	96.23	4315071480	3935552605	91.2	40514574	98.55	37367086	92.23	26272015	9.46	9.49	374308257	83.53	79.29	68.92	43.79	5.01
RWG-037	40839910	39623262	97.02	4124830910	3806511965	92.28	39077793	98.62	35843456	91.72	25260968	9.06	9.13	374308257	82.55	78.15	67.39	41.76	4.4
RWG-038	48855160	47558040	97.34	4934371160	4580388812	92.83	46916066	98.65	42984632	91.62	30665847	11.05	10.97	374308257	83.12	79.13	70.38	52.22	10.06
RWG-039	48681544	47575994	97.73	4916835944	4590491203	93.36	46836030	98.44	42797946	91.38	29854165	10.83	10.95	374308257	84.3	80.45	71.73	51.61	8.59
RWG-040	44347200	43173014	97.35	4479067200	4159678899	92.87	42730067	98.97	41147403	96.3	32122785	10.74	10.56	374308257	88.25	85.11	76.78	53.37	6.16
RWG-041	32777040	31455204	95.97	3310481040	2968785869	89.68	30368221	96.54	26351981	86.77	17321686	5.59	6.47	374308257	89.54	83.89	57.68	16.44	1.98
RWG-042	34642200	33312470	96.16	3498862200	3157333547	90.24	32855082	98.63	30718030	93.5	22302278	7.57	7.74	374308257	90.11	85.78	68.8	28.17	1.69
RWG-043	33428974	32374090	96.84	3376326374	3093091737	91.61	31724826	97.99	28996420	91.4	20295166	7.22	7.35	374308257	87.61	82.32	63.89	25.76	2
RWG-044	36119662	34917466	96.67	3648085862	3323871993	91.11	34464112	98.7	31679715	91.92	22721055	8.22	8	374308257	88.85	84.33	68.39	31.26	2.24
RWG-045	34714646	33299862	95.92	3506179246	3160491893	90.14	32917510	98.85	31357083	95.26	24015190	8.08	7.93	374308257	92.13	88.14	71.16	30.1	1.35
RWG-046	32669522	31599934	96.73	3299621722	3012177740	91.29	31230327	98.83	30133026	96.49	23455702	7.44	7.66	374308257	94.16	90.78	73.01	27.14	1.01
RWG-047	34377240	33296884	96.86	3472101240	3186001785	91.76	31741767	95.33	25768394	81.18	16023327	5.45	6.28	374308257	86.32	78.19	50.9	16.97	2.55
RWG-048	41693484	40305012	96.67	4211041884	3835548356	91.08	39677819	98.44	36304146	91.5	25913659	9.22	9.15	374308257	89.55	85.77	73.54	40.75	3.65
RWG-049	40874474	39828614	97.44	4128321874	3813621216	92.38	39217037	98.46	35897942	91.54	25075571	9.27	9.12	374308257	88.51	84.36	71.07	38.91	3.55
RWG-050	39844282	38870008	97.55	4024272482	3718316775	92.4	38373531	98.72	37633865	98.07	30038004	9.42	9.61	374308257	96.6	94.71	84.04	44.17	1.8
RWG-051	33830612	32869664	97.16	3416891812	3141433084	91.94	32415510	98.62	30983677	95.58	23506345	7.88	7.89	374308257	92.26	88.53	71.86	29.02	1.31
RWG-052	39658424	38705864	97.6	4005500824	3708808453	92.59	38111109	98.46	37105851	97.36	28658892	9.17	9.49	374308257	95.99	93.58	80.63	40.25	1.71
RWG-053	34291672	33099846	96.52	3463458872	3148850639	90.92	32588025	98.45	29805412	91.46	20923764	7.43	7.52	374308257	88.17	83.25	65.61	26.53	1.92
RWG-054	34322622	33492862	97.58	3466584822	3221516446	92.93	33002107	98.53	30407233	92.14	21536658	7.72	7.75	374308257	89.05	83.79	65.62	28.12	1.99
RWG-055	36094318	35160052	97.41	3645526118	3370248491	92.45	34535037	98.22	33128013	95.93	24848627	8.37	8.46	374308257	92.95	89.1	72.55	32.4	1.44
RWG-056	38392874	37456258	97.56	3877680274	3587371258	92.51	36791692	98.23	33951303	92.28	23153995	8.45	8.63	374308257	88.8	84.56	69.65	33.25	2.65
RWG-057	41562620	40523930	97.5	4197824620	3879256601	92.41	39845408	98.33	38151013	95.75	28983778	9.64	9.73	374308257	93.4	90.77	79.6	44.66	3.05
RWG-058	38399478	37185290	96.84	3878347278	3531540341	91.06	36780481	98.91	34996757	95.15	26424198	8.61	8.85	374308257	93.4	90.59	77.6	37.55	2.05
RWG-059	37311604	36253178	97.16	3768472004	3458914855	91.79	35784281	98.71	35152209	98.23	27879613	8.65	8.96	374308257	96.53	94.25	80.79	37.46	1.3
RWG-060	40233840	39254968	97.57	4063617840	3766372235	92.69	38523162	98.14	35536855	92.25	24938409	9.04	9.04	374308257	88.64	84.33	70.53	38.47	3.59
RWG-061	32754558	31341490	95.69	3308210358	2920268807	88.27	30944865	98.73	28256838	91.31	19443850	6.86	6.98	374308257	88.29	82.49	61.36	21.81	1.77
RWG-062	33354528	32028012	96.02	3368807328	2997463528	88.98	31612637	98.7	30757298	97.29	24146288	7.62	7.68	374308257	93.55	89.21	69.88	27.31	0.89
RWG-063	37676414	35888122	95.25	3805317814	3332856183	87.58	35503272	98.93	34466639	97.08	27128659	8.49	8.54	374308257	94.3	90.83	75.05	35.65	1.6
RWG-064	34530572	33032336	95.66	3487587772	3088009064	88.54	32501170	98.39	29825817	91.77	20542116	7.32	7.4	374308257	87.34	81.62	62.72	25.76	1.97
RWG-065	34329264	32852446	95.7	3467255664	3068736064	88.51	32514208	98.97	31611513	97.22	24969982	7.87	7.88	374308257	94.55	90.8	72.62	29.43	0.97
RWG-066	31087608	29595894	95.2	3139848408	2747987666	87.52	29244551	98.81	28005111	95.76	21261729	6.75	6.93	374308257	91.94	86.68	64.36	21.41	0.87
RWG-067	31643396	30579398	96.64	3195982996	2880326015	90.12	30176868	98.68	27811292	92.16	19333253	7.03	6.95	374308257	87.65	81.86	60.96	21.63	1.6
RWG-068	33009248	31966098	96.84	3333934048	3021083722	90.62	31430505	98.32	28919930	92.01	19925299	6.89	7.25	374308257	88.17	82.75	62.85	23.94	2.12
RWG-069	32940130	31592330	95.91	3326953130	2962869407	89.06	31244924	98.9	30257608	96.84	23784592	7.62	7.57	374308257	93.46	89.24	70.08	27.51	1.06
RWG-070	33368110	32194990	96.48	3370179110	3029658700	89.9	31780009	98.71	29220588	91.95	20350545	7.38	7.29	374308257	89.33	83.52	62.87	24.57	1.85
RWG-071	34218726	32918874	96.2	3456091326	3097838209	89.63	32401241	98.43	29934666	92.39	20714139	7.39	7.47	374308257	88.19	82.81	63.83	25.7	1.92
RWG-072	34500572	33273760	96.44	3484557772	3134250971	89.95	32817286	98.63	30216815	92.08	21154376	7.64	7.55	374308257	88.17	82.99	64.65	27.04	2.09
RWG-073	38789826	37969238	97.88	3917772426	3649379921	93.15	37159524	97.87	34350851	92.44	23778064	8.75	8.76	374308257	89.17	84.91	70.13	34.57	2.63
RWG-074	38160882	37269086	97.66	3854249082	3579094717	92.86	36681418	98.42	35967394	98.05	28517292	9.22	9.22	374308257	96.11	93.7	80.33	39.64	1.6
RWG-075	39100904	37952942	97.06	3949191304	3628835063	91.89	37410760	98.57	36416918	97.34	28919644	9.22	9.29	374308257	95.23	92.88	80.72	41.34	1.78
RWG-076	41359608	40315054	97.47	4177320408	3860368608	92.41	39802178	98.73	38721167	97.28	30964898	9.9	9.89	374308257	94.91	92.73	82.7	47.37	2.59
RWG-077	33248582	32298892	97.14	3358106782	3101469916	92.36	31914033	98.81	30980002	97.07	24538346	7.93	7.93	374308257	94.09	90.48	73.02	29.47	0.94
RWG-078	30448672	29523968	96.96	3075315872	2826032147	91.89	29122026	98.64	28303125	97.19	22294422	7.13	7.23	374308257	94.19	90.18	69.43	22.4	0.62
RWG-079	37292534	36300480	97.34	3766545934	3476018017	92.29	35705680	98.36	32665079	91.48	26050191	8.39	8.35	374308257	96.14	93.48	77.51	31.35	0.87
RWG-080	39705222	38856968	97.86	4010227422	3740719559	93.28	38270117	98.49	37302867	97.47	29619384	9.99	9.58	374308257	95.5	93.12	80.58	42.2	2.2
RWG-081	34711164	33641286	96.92	3505827564	3227144894	92.05	33186351	98.65	31813072	95.86	24519154	8.11	8.13	374308257	93.09	89.38	72.88	31.1	1.25
RWG-082	41089210	40134816	97.68	4150010210	3846622696	92.69	39646027	98.78	38600297	97.36	30955493	9.97	9.88	374308257	96.53	94.69	84.36	46.19	2.21
RWG-083	40293128	39315734	97.57	4069605928	3776025784	92.79	38602131	98.18	37803728	97.93	29715911	9.68	9.69	374308257	96.16	93.73	80.8	42.3	2.06
RWG-084	31990280	31117968	97.27	3231018280	2987280962	92.46	30663561	98.54	30080409	98.1	24083924	7.7	7.71	374308257	95.49	91.81	72.7	27.15	0.75
RWG-085	26352200	25750922	97.72	2635220000	2509969224	95.25	25208168	97.89	23171300	91.92	14841847	4.91	5.98	374308257	89.25	82.27	51.09	11.48	1.44
RWG-086	35534792	34623396	97.44	3553479200	3385254058	95.27	34045400	98.33	31111796	91.38	20755413	7.9	8.07	374308257	89.39	85.42	69.21	26.34	2.2
RWG-087	30345548	29631128	97.65	3034554800	2894181528	95.37	29138345	98.34	28433972	97.58	22274370	6.54	7.41	374308257	97.02	94.64	75.05	21.64	0.64
RWG-088	30793506	29920644	97.17	3079350600	2924538418	94.97	29469681	98.49	28689595	97.35	21508561	7.16	7.48	374308257	96.54	93.77	72.74	18.96	0.56
RWG-089	30664418	29848138	97.34	3066441800	2917987569	95.16	29179479	97.76	27791334	95.24	19380838	6.87	7.24	374308257	93.16	89.24	65.99	15.97	0.79
RWG-090	40579064	39526758	97.41	4057906400	3868621720	95.34	38570975	97.58	36797033	95.4	26334514	8.93	9.59	374308257	94.03	91.88	81.12	37.24	1.52
RWG-091	30994856	30120236	97.18	3099485600	2944462488	95	29473541	97.85	28726905	97.47	20737991	6.92	7.49	374308257	96.62	93.64	70.49	15.87	0.51
RWG-092	30070156	29311984	97.48	3007015600	2869868103	95.44	28593244	97.55	27792811	97.2	20220768	6.61	7.26	374308257	95.8	92.4	68.36	14.98	0.52
RWG-093	25660304	24988342	97.38	2566030400	2444250211	95.25	24453447	97.86	23906555	97.76	17530556	5.65	6.24	374308257	96.96	92.64	59.26	7.41	0.4
RWG-094	29468194	28762220	97.6	2946819400	2812848854	95.45	28018367	97.41	27181980	97.01	19676599	6.12	7.09	374308257	96.14	92.91	67.29	13.3	0.51
RWG-095	32798818	32005850	97.58	3279881800	3135970061	95.61	31023009	96.93	30275677	97.59	22119815	6.99	7.92	374308257	97.01	94.35	74.09	18.93	0.51
RWG-096	29340494	28733184	97.93	2934049400	2815396153	95.96	27649895	96.23	26913370	97.34	19368619	6.43	7.03	374308257	96.47	93.01	65.83	11.72	0.44
RWG-097	25946104	25357478	97.73	2594610400	2469547607	95.18	24686661	97.35	24124562	97.72	17932331	4.93	6.26	374308257	94.25	86.78	57.49	15.54	0.51
RWG-098	24171302	23737384	98.2	2417130200	2328752062	96.34	22924890	96.58	21885884	95.47	15292357	5.23	5.72	374308257	92.01	86.11	51.36	6.28	0.51
RWG-099	26844080	26199026	97.6	2684408000	2567041917	95.63	25479274	97.25	24800885	97.34	17960697	5.82	6.48	374308257	96.26	92.24	60.96	8.36	0.4
RWG-100	25906966	25365256	97.91	2590696600	2486593118	95.98	24764562	97.63	24201216	97.73	17777830	5.62	6.33	374308257	96.91	92.66	60.13	7.79	0.4
RWG-101	26492650	25731492	97.13	2649265000	2507799145	94.66	25109465	97.58	23805006	94.8	16952395	4.89	6.17	374308257	91.85	85.04	55.74	14.77	0.87
RWG-102	28419302	27621826	97.19	2841930200	2699354512	94.98	26899211	97.38	25465039	94.67	17884303	5.4	6.62	374308257	92.94	87.54	59.47	15.66	0.97
RWG-103	23956664	23289788	97.22	2395666400	2267828912	94.66	22692318	97.43	22130772	97.53	16372878	4.49	5.75	374308257	93.53	85.6	53.27	10.87	0.46
RWG-104	28491062	27630338	96.98	2849106200	2691584402	94.47	26882997	97.3	26045426	96.88	18970590	5.2	6.76	374308257	93.83	87.25	60.22	17.77	0.67
RWG-105	27713104	26822556	96.79	2771310400	2609899018	94.18	26030048	97.05	23891090	91.78	15706702	4.65	6.17	374308257	89.94	79.78	49.84	16.86	1.78
RWG-106	28889450	28234872	97.73	2888945000	2763243276	95.65	27509576	97.43	25997361	94.5	18540530	5.94	6.77	374308257	92.76	87.97	62.18	16.43	0.99
RWG-107	25312990	24730388	97.7	2531299000	2425109590	95.8	23763649	96.09	22535153	94.83	15638266	5.48	5.88	374308257	91.74	85.43	51.86	7.39	0.54
RWG-108	19823104	19389932	97.81	1982310400	1889876806	95.34	19012792	98.05	17443578	91.75	11761770	4.42	4.52	374308257	85.77	76.14	37.52	4.47	0.75
RWG-109	26357768	25953726	98.47	2635776800	2543644128	96.5	25565318	98.5	23581021	92.24	15547273	5.75	6.14	374308257	87.9	82.41	55.92	10.96	1.29
RWG-110	25683718	25003068	97.35	2568371800	2434057495	94.77	24387252	97.54	23032526	94.44	15861839	5.46	5.97	374308257	90.66	84.94	53.65	8.31	0.71
RWG-111	25867658	25245520	97.59	2586765800	2458276912	95.03	24949252	98.83	24235829	97.14	18269674	6.05	6.3	374308257	94.71	90.24	61.69	11.31	0.48
RWG-112	26495240	25790388	97.34	2649524000	2510548217	94.75	25149123	97.51	23121247	91.94	14868468	5.34	5.98	374308257	87.48	80.84	51.68	9.46	1.14
RWG-113	26094662	25343846	97.12	2609466200	2465146606	94.47	24839174	98.01	22615049	91.05	15091700	5.65	5.84	374308257	87.14	80.85	52.63	10.11	1.12
RWG-114	25840652	25195654	97.5	2584065200	2452408356	94.91	24985220	99.16	24486503	98	18980111	6.11	6.36	374308257	97.05	93.67	65.12	10.12	0.39
RWG-115	23359928	22804366	97.62	2335992800	2216144903	94.87	22585746	99.04	21934915	97.12	16672283	5.39	5.69	374308257	93.96	88.93	55.87	7.33	0.41
RWG-116	20391100	19859374	97.39	2039110000	1928106247	94.56	19612994	98.76	17888837	91.21	11797311	4.39	4.61	374308257	85.84	76.81	38.29	4.53	0.86
RWG-117	24845852	24242756	97.57	2484585200	2354928630	94.78	23746090	97.95	22970604	96.73	16264567	5.5	5.95	374308257	93.62	87.87	53.54	6.97	0.45
RWG-118	21194474	20693072	97.63	2119447400	2012231207	94.94	20443759	98.8	18742386	91.68	12480608	4.56	4.84	374308257	86.65	78.6	41.82	5.3	0.95
RWG-119	23781222	23233302	97.7	2378122200	2257795225	94.94	22947538	98.77	21023439	91.62	14001829	5.15	5.42	374308257	87.34	80.62	48.86	7.71	1.07
RWG-120	24146542	23333940	96.63	2414654200	2252184612	93.27	22756514	97.53	20542835	90.27	12899715	4.05	5.25	374308257	84.26	73.39	42.78	11.53	1.69
RWG-121	29265962	28469686	97.28	2926596200	2763391137	94.42	27773648	97.56	25426815	91.55	16899110	5.69	6.55	374308257	89.4	84.49	60.19	14.97	1.7
RWG-122	30000496	28853026	96.18	3000049600	2796442734	93.21	27390154	94.93	24481124	89.38	15599995	5.2	6.28	374308257	88.21	82	54.25	12.23	1.39
RWG-123	31119638	30462340	97.89	3111963800	2976714031	95.65	29341396	96.32	26901745	91.69	17921496	6.27	6.98	374308257	88.44	83.05	61.77	17.83	1.51
RWG-124	24465148	23734402	97.01	2446514800	2309365087	94.39	23173658	97.64	21284890	91.85	13868666	4.95	5.5	374308257	87.7	80.78	48.18	7.81	1.14
RWG-125	28004752	27539382	98.34	2800475200	2696614512	96.29	26915838	97.74	24858426	92.36	16349690	5.88	6.46	374308257	88.54	82.89	57.65	12.91	1.3
RWG-126	24369122	23634888	96.99	2436912200	2295348377	94.19	22689102	96	20798201	91.67	13233348	4.68	5.36	374308257	86.58	78.43	44.33	7.38	1.1
RWG-127	30382970	29807496	98.11	3038297000	2914953376	95.94	28802550	96.63	28095537	97.55	20738455	6.62	7.33	374308257	96.18	93.1	70.29	15.24	0.46
RWG-128	29394732	28615898	97.35	2939473200	2786578121	94.8	27913286	97.54	27292421	97.78	20238990	6.52	7.09	374308257	96.42	93.19	68.83	14.17	0.46
RWG-129	33673804	32673158	97.03	3367380400	3158868131	93.81	31776285	97.26	30578670	96.23	22602254	6.4	7.86	374308257	93.25	87.06	64.05	29.76	2.45
RWG-130	30446206	29676284	97.47	3044620600	2892295070	95	29206044	98.42	28468643	97.48	21923666	7.03	7.4	374308257	95.7	92.77	73.04	20.2	0.57
RWG-131	24363850	24034368	98.65	2436385000	2355539826	96.68	23688079	98.56	21817086	92.1	14563192	5.38	5.68	374308257	87.5	81.46	51.85	8.76	1.16
RWG-132	24403908	23968948	98.22	2440390800	2344211558	96.06	23541069	98.21	22491680	95.54	16020185	5.39	5.86	374308257	91.96	86.74	55.4	7.86	0.58
RWG-133	32095406	31217874	97.27	3209540600	3033275153	94.51	30808222	98.69	30263356	98.23	23760047	6.99	7.85	374308257	97.15	95.04	78.41	25.6	0.67
RWG-134	23048798	22481470	97.54	2304879800	2189035061	94.97	22188732	98.7	21805308	98.27	16787431	5.18	5.67	374308257	96.5	92.14	57.11	6.04	0.39
RWG-135	19396558	19087178	98.4	1939655800	1869361911	96.38	18866394	98.84	18444507	97.76	13767162	4.47	4.82	374308257	94.42	86.99	42.78	2.91	0.35
RWG-136	26849164	26407172	98.35	2684916400	2587520716	96.37	26078687	98.76	25525034	97.88	19339612	6.19	6.68	374308257	95.95	92.51	66.65	12.12	0.44
RWG-137	23061710	22645880	98.2	2306171000	2218905772	96.22	22304676	98.49	20405423	91.48	13221093	4.87	5.31	374308257	86.01	78.58	45.95	6.91	1.02
